# Supplementary material for: Mononucleotide repeats are asymmetrically distributed in fungal genes
Source: Springer Nature journal article supplement (doi:10.1186/1471-2164-9-596), 2008-01-01
Supplement: Additional file 3 [file 1471-2164-9-596-s3.docx]

**Additional file 3**.

File format: doc file

Title: Repertoire sizes of genes with different repeat lengths

Description: Gene repertoire sizes of the fungi, and the counts and fractions of genes that contain repeats of lengths five until greater than nine.

|  | **Gene counts per genome containing repeats of said length** | | | | | | | **Genome fractions containing repeats of said length (%)** | | | | | | |
| --- | --- | --- | --- | --- | --- | --- | --- | --- | --- | --- | --- | --- | --- | --- |
| **Species** | **All CDS** | **5** | **6** | **7** | **8** | **9** | **>9** | **All CDS** | **5** | **6** | **7** | **8** | **9** | **>9** |
| Ac | 9110 | 7965 | 3644 | 820 | 129 | 40 | 21 | 100 | 87.43 | 40.00 | 9.00 | 1.42 | 0.44 | 0.23 |
| Afl | 12434 | 10634 | 4521 | 891 | 138 | 30 | 10 | 100 | 85.52 | 36.36 | 7.17 | 1.11 | 0.24 | 0.08 |
| Afu | 9884 | 8586 | 3865 | 986 | 219 | 98 | 62 | 100 | 86.87 | 39.10 | 9.98 | 2.22 | 0.99 | 0.63 |
| Anid | 10474 | 9137 | 4137 | 971 | 186 | 39 | 11 | 100 | 87.24 | 39.50 | 9.27 | 1.78 | 0.37 | 0.11 |
| Anig | 6329 | 5716 | 2532 | 523 | 106 | 56 | 38 | 100 | 90.31 | 40.01 | 8.26 | 1.67 | 0.88 | 0.60 |
| Ao | 12063 | 10402 | 4393 | 901 | 176 | 50 | 23 | 100 | 86.23 | 36.42 | 7.47 | 1.46 | 0.41 | 0.19 |
| At | 10400 | 9279 | 4023 | 617 | 73 | 21 | 11 | 100 | 89.22 | 38.68 | 5.93 | 0.70 | 0.20 | 0.11 |
| Bd | 8779 | 8169 | 6050 | 3106 | 1104 | 212 | 30 | 100 | 93.05 | 68.91 | 35.38 | 12.58 | 2.41 | 0.34 |
| Bc | 15512 | 12409 | 6004 | 1634 | 305 | 95 | 46 | 100 | 80.00 | 38.71 | 10.53 | 1.97 | 0.61 | 0.30 |
| Ca_sc | 5916 | 5762 | 4615 | 2255 | 688 | 250 | 137 | 100 | 97.40 | 78.01 | 38.12 | 11.63 | 4.23 | 2.32 |
| Ca_wo | 5851 | 5690 | 4543 | 2178 | 630 | 203 | 94 | 100 | 97.25 | 77.64 | 37.22 | 10.77 | 3.47 | 1.61 |
| Cgu | 5897 | 5622 | 3845 | 1458 | 349 | 64 | 13 | 100 | 95.34 | 65.20 | 24.72 | 5.92 | 1.09 | 0.22 |
| Cl | 5891 | 5437 | 3379 | 1250 | 355 | 142 | 70 | 100 | 92.29 | 57.36 | 21.22 | 6.03 | 2.41 | 1.19 |
| Cp | 5687 | 5468 | 3730 | 1494 | 480 | 203 | 114 | 100 | 96.15 | 65.59 | 26.27 | 8.44 | 3.57 | 2.00 |
| Ct | 6216 | 5981 | 4369 | 1680 | 499 | 257 | 187 | 100 | 96.22 | 70.29 | 27.03 | 8.03 | 4.13 | 3.01 |
| Cgl | 10987 | 9932 | 6092 | 2619 | 758 | 198 | 58 | 100 | 90.40 | 55.45 | 23.84 | 6.90 | 1.80 | 0.53 |
| Cih | 10450 | 8828 | 4028 | 1092 | 261 | 63 | 30 | 100 | 84.48 | 38.55 | 10.45 | 2.50 | 0.60 | 0.29 |
| Ci_2394 | 10368 | 8946 | 4363 | 1226 | 302 | 76 | 38 | 100 | 86.28 | 42.08 | 11.82 | 2.91 | 0.73 | 0.37 |
| Ci_3703 | 10379 | 8772 | 4027 | 1114 | 278 | 82 | 41 | 100 | 84.52 | 38.80 | 10.73 | 2.68 | 0.79 | 0.40 |
| Ci_rs | 10609 | 9199 | 4528 | 1285 | 311 | 85 | 41 | 100 | 86.71 | 42.68 | 12.11 | 2.93 | 0.80 | 0.39 |
| Cp_3488 | 9932 | 8589 | 4215 | 1163 | 271 | 93 | 38 | 100 | 86.48 | 42.44 | 11.71 | 2.73 | 0.94 | 0.38 |
| Cp_silvereira | 10070 | 8668 | 4197 | 1132 | 269 | 80 | 37 | 100 | 86.08 | 41.68 | 11.24 | 2.67 | 0.79 | 0.37 |
| Cc | 13523 | 11202 | 4209 | 638 | 105 | 31 | 10 | 100 | 82.84 | 31.12 | 4.72 | 0.78 | 0.23 | 0.07 |
| Cn | 7077 | 6399 | 3686 | 1148 | 254 | 60 | 19 | 100 | 90.42 | 52.08 | 16.22 | 3.59 | 0.85 | 0.27 |
| Dh | 6101 | 5682 | 3926 | 1702 | 483 | 113 | 35 | 100 | 93.13 | 64.35 | 27.90 | 7.92 | 1.85 | 0.57 |
| Fg | 13220 | 10695 | 3757 | 709 | 113 | 33 | 15 | 100 | 80.90 | 28.42 | 5.36 | 0.85 | 0.25 | 0.11 |
| Fo | 17202 | 13218 | 4440 | 905 | 114 | 32 | 16 | 100 | 76.84 | 25.81 | 5.26 | 0.66 | 0.19 | 0.09 |
| Fv | 14002 | 10849 | 3635 | 684 | 105 | 17 | 7 | 100 | 77.48 | 25.96 | 4.89 | 0.75 | 0.12 | 0.05 |
| Hc | 9164 | 8146 | 4686 | 1601 | 403 | 114 | 44 | 100 | 88.89 | 51.13 | 17.47 | 4.40 | 1.24 | 0.48 |
| Le | 5739 | 5457 | 3903 | 1820 | 605 | 207 | 113 | 100 | 95.09 | 68.01 | 31.71 | 10.54 | 3.61 | 1.97 |
| Mg | 12564 | 10464 | 4038 | 714 | 199 | 48 | 29 | 100 | 83.29 | 32.14 | 5.68 | 1.58 | 0.38 | 0.23 |
| Nf | 10383 | 9025 | 3648 | 626 | 81 | 13 | 3 | 100 | 86.92 | 35.13 | 6.03 | 0.78 | 0.13 | 0.03 |
| Nc | 9795 | 8428 | 3975 | 927 | 107 | 30 | 12 | 100 | 86.04 | 40.58 | 9.46 | 1.09 | 0.31 | 0.12 |
| Pb | 9235 | 8123 | 4494 | 1564 | 413 | 116 | 45 | 100 | 87.96 | 48.66 | 16.94 | 4.47 | 1.26 | 0.49 |
| Pg | 20462 | 18441 | 11169 | 4040 | 1243 | 476 | 200 | 100 | 90.12 | 54.58 | 19.74 | 6.07 | 2.33 | 0.98 |
| Pt | 12092 | 9726 | 3889 | 748 | 93 | 15 | 5 | 100 | 80.43 | 32.16 | 6.19 | 0.77 | 0.12 | 0.04 |
| Ro | 17074 | 15198 | 9799 | 3957 | 1244 | 392 | 128 | 100 | 89.01 | 57.39 | 23.18 | 7.29 | 2.30 | 0.75 |
| Sce | 5272 | 5009 | 3904 | 2272 | 985 | 341 | 111 | 100 | 95.01 | 74.05 | 43.10 | 18.68 | 6.47 | 2.11 |
| Sj | 5122 | 4603 | 3116 | 1280 | 341 | 71 | 13 | 100 | 89.87 | 60.84 | 24.99 | 6.66 | 1.39 | 0.25 |
| So | 4906 | 4641 | 3538 | 1824 | 628 | 160 | 31 | 100 | 94.60 | 72.12 | 37.18 | 12.80 | 3.26 | 0.63 |
| Sp | 4991 | 4809 | 3878 | 2222 | 886 | 279 | 85 | 100 | 96.35 | 77.70 | 44.52 | 17.75 | 5.59 | 1.70 |
| Scl | 13704 | 11235 | 5603 | 1536 | 344 | 86 | 38 | 100 | 81.98 | 40.89 | 11.21 | 2.51 | 0.63 | 0.28 |
| Sn | 15949 | 11449 | 3702 | 706 | 102 | 21 | 9 | 100 | 71.79 | 23.21 | 4.43 | 0.64 | 0.13 | 0.06 |
| Ur | 7777 | 6973 | 3575 | 922 | 169 | 32 | 17 | 100 | 89.66 | 45.97 | 11.86 | 2.17 | 0.41 | 0.22 |
| Um | 6517 | 5335 | 2068 | 449 | 61 | 19 | 10 | 100 | 81.86 | 31.73 | 6.89 | 0.94 | 0.29 | 0.15 |
| Va | 10098 | 8296 | 3374 | 940 | 221 | 85 | 51 | 100 | 82.15 | 33.41 | 9.31 | 2.19 | 0.84 | 0.51 |
| Vd | 10453 | 8827 | 3627 | 938 | 168 | 63 | 36 | 100 | 84.44 | 34.70 | 8.97 | 1.61 | 0.60 | 0.34 |
